# Supplementary material for: Exploring cluster formation in Zr-MOF synthesis in situ using X-ray absorption spectroscopy
Source: Royal Society of Chemistry journal article supplement (doi:10.1039/d4cp01979b), 2024-01-01
Supplement: d4cp01979b1.pdf [file d4cp01979b1.pdf]

# Exploring cluster formation in Zr-MOF synthesis in situ with X-ray absorption spectroscopy

Olena Zavorotyńska,<sup>1\*</sup> Anna Cecilie Åsland,<sup>1</sup> Pascal D. C. Dietzel,<sup>2</sup> and Sachin M. Chavan<sup>3\*</sup>

<sup>1</sup>Department of Mathematics and Physics, University of Stavanger, Stavanger P.O. Box 8600, NO-4036 Forus, Norway.

<sup>2</sup>Department of Chemistry, University of Bergen, P.O. Box 7803, N-5020 Bergen, Norway.

<sup>3</sup>Department of Chemistry, Bioscience and Environmental Engineering, University of Stavanger, Stavanger P.O. Box 8600, NO-4036 Forus, Norway.

## Electronic Supplementary Information

### Content

|                                                                                                      |    |
|------------------------------------------------------------------------------------------------------|----|
| 1. Synthesis .....                                                                                   | 2  |
| 2. XAS spectra of reference compounds .....                                                          | 3  |
| 3. EXAFS fitting and LCF details of r1-r2 .....                                                      | 5  |
| 4. MOF synthesis reactions .....                                                                     | 8  |
| 4.1 LCF of r3-r6 reactions .....                                                                     | 8  |
| 4.2 Local structure of Zr <sup>4+</sup> in MOF-synthesis reaction with water and modulator (r6) .... | 11 |
| 4.3 Kinetics series .....                                                                            | 13 |
| 5. LCF and reaction kinetics .....                                                                   | 18 |
| 5.1 Water series .....                                                                               | 18 |
| 5.2 Temperature series .....                                                                         | 18 |
| 6. Characterization of MOFs formed in the in-situ reactions .....                                    | 20 |
| 6.1 Modulator series .....                                                                           | 20 |
| 6.2 Temperature series .....                                                                         | 21 |
| 6.3 Water series .....                                                                               | 21 |
| 6.4 Analysis of the Raman spectra .....                                                              | 22 |

# 1. Synthesis

**Table S1.** Reagents stoichiometries in the synthesis reactions.

| <i>N</i>                        | ZrCl <sub>4</sub><br>(g) | Fumaric<br>acid (g)<br>(FA) | Water<br>(ml) | Acetic<br>acid (ml)<br>(MOD) | DMF<br>(ml) | Temp.<br>(°C) | Reaction<br>time<br>(min) | Stoichiometry,<br>eq.<br>(ZrCl <sub>4</sub> :FA:H <sub>2</sub> O:<br>MOD:DMF) |
|---------------------------------|--------------------------|-----------------------------|---------------|------------------------------|-------------|---------------|---------------------------|-------------------------------------------------------------------------------|
| ZrCl <sub>4</sub> -DMF solution |                          |                             |               |                              |             |               |                           |                                                                               |
| <b>r1</b>                       | 0.255                    | 0                           | 0             | 0                            | 4.0         | 120           | 97                        | 1:0:0:0:49                                                                    |
| <b>r2</b>                       | 0.250                    | 0                           | 0.058         | 1.23                         | 4.0         | 120           | 44                        | 1:0:3:20:49                                                                   |
| Zr-fumerate synthesis reactions |                          |                             |               |                              |             |               |                           |                                                                               |
| <b>r3</b>                       | 0.250                    | 0.374                       | 0             | 0                            | 4.0         | 120           | 143                       | 1:3:0:0:49                                                                    |
| <b>r4</b>                       | 0.250                    | 0.374                       | 0             | 0.613                        | 4.0         | 120           | 171                       | 1:3:0:10:49                                                                   |
| <b>r5</b>                       | 0.250                    | 0.374                       | 0.058         | 0                            | 4.0         | 120           | 67                        | 1:3:3:0:49                                                                    |
| <b>r6</b>                       | 0.250                    | 0.374                       | 0.058         | 0.613                        | 4.0         | 120           | 257                       | 1:3:3:10:49                                                                   |
| <b>r7</b>                       | 0.250                    | 0.374                       | 0.058         | 1.23                         | 4.0         | 120           | 77                        | 1:3:3:20:49                                                                   |
| <b>r8</b>                       | 0.250                    | 0.374                       | 0.155         | 1.23                         | 4.0         | 120           | 55                        | 1:3:8:20:49                                                                   |
| <b>r9</b>                       | 0.250                    | 0.374                       | 0.058         | 1.23                         | 4.0         | 100           | 55                        | 1:3:3:20:49                                                                   |
| <b>r10</b>                      | 0.250                    | 0.374                       | 0.058         | 1.23                         | 4.0         | 130           | 49                        | 1:3:3:20:49                                                                   |

## 2. XAS spectra of reference compounds

i)

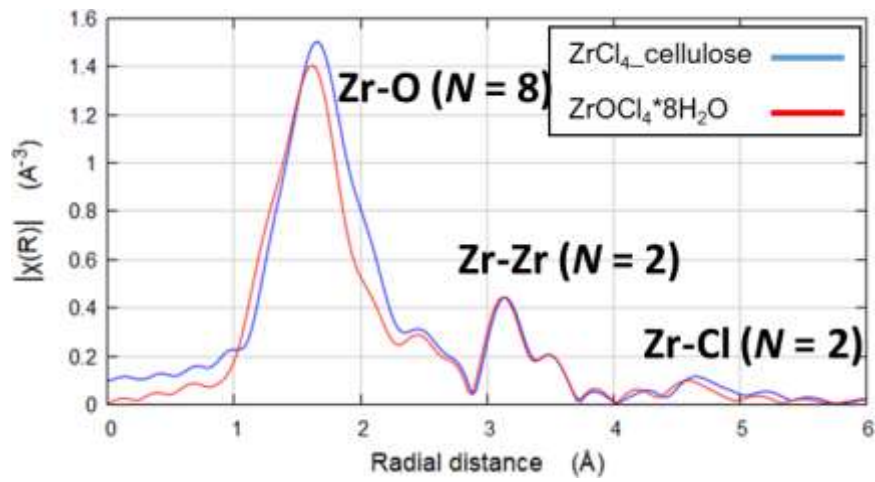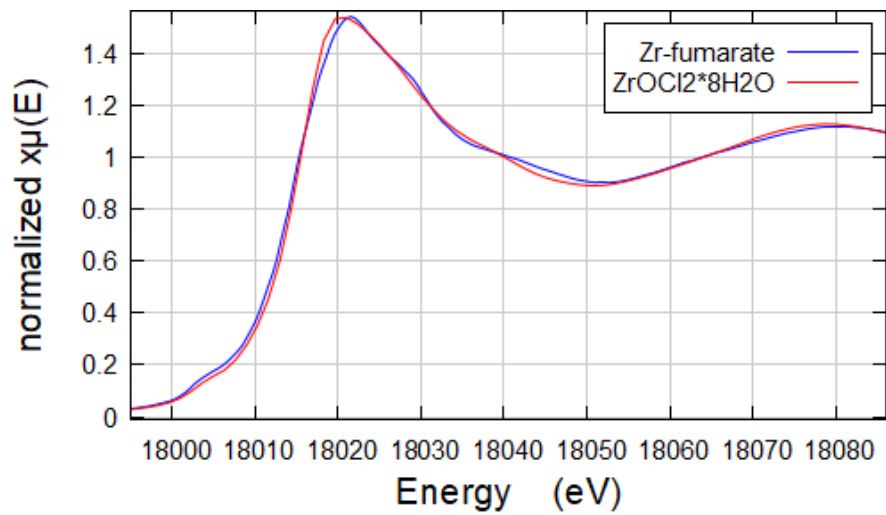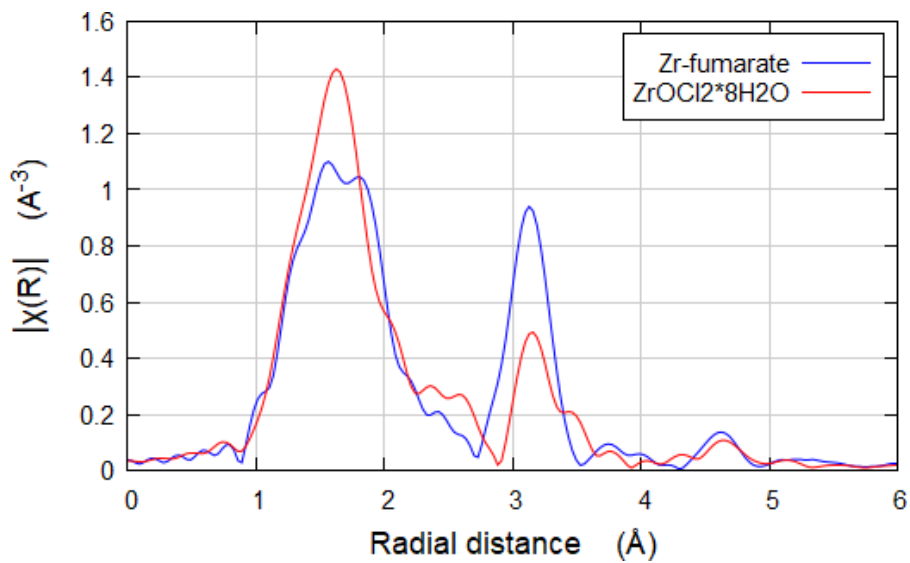

ii)

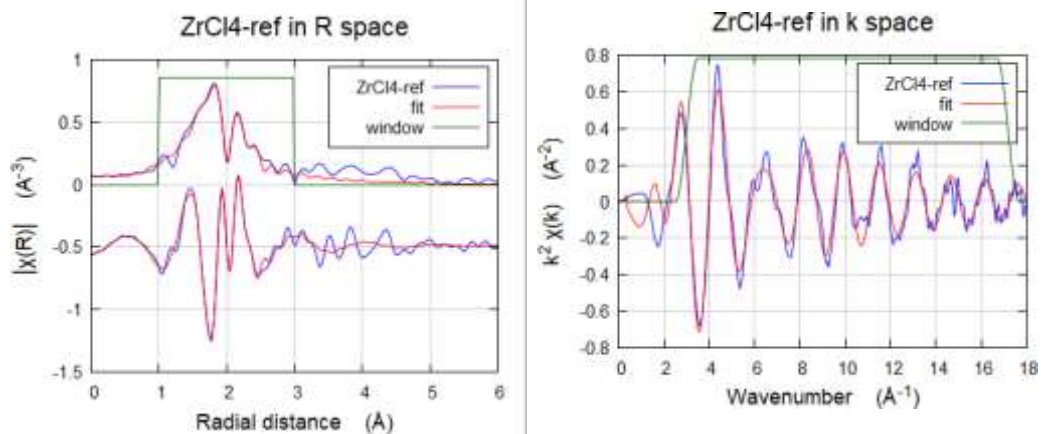

$k$ -range used for FT

3.000 – 17.181

$k$ -weight

1, 2, 3

$R$ -factor by  $k$ -weight

1 -> 0.00655, 2 -> 0.01837, 3 -> 0.0452323

$N_{\text{ind}}$

17.6

$N_{\text{var}}$

8

$\frac{\chi^2}{\chi^2}$

7263

$\frac{\chi^2}{\chi^2}$

754

$\Delta\chi$

$0.6 \pm 0.6$  eV

$\chi^2_0$  Amplitude,  $\chi^2_0$

$0.83 \pm 0.06$

| Shell  | $R(\text{\AA})$ | $N$ | $\sigma^2 (\text{\AA}^2)^a$ |
|--------|-----------------|-----|-----------------------------|
| Zr-Cl1 | 2.318(6)        | 2   | 0.0020(5)                   |
| Zr-Cl2 | 2.490(12)       | 2   | 0.004(1)                    |
| Zr-Cl3 | 2.637(14)       | 2   | 0.006(2)                    |

**Fig. S1a** i) Experimental spectra of  $\text{ZrCl}_4$ ,  $\text{ZrOCl}_2 \cdot (8\text{H}_2\text{O})$ , and Zr-fumarate as cellulose-supported pellets. The peaks are assigned based on the calculation of the cluster geometry<sup>1</sup> by ATOMS.<sup>2</sup> ii) Fit results of the reference anhydrous  $\text{ZrCl}_4$ -ref.

### 3. EXAFS fitting and LCF details of r1-r2

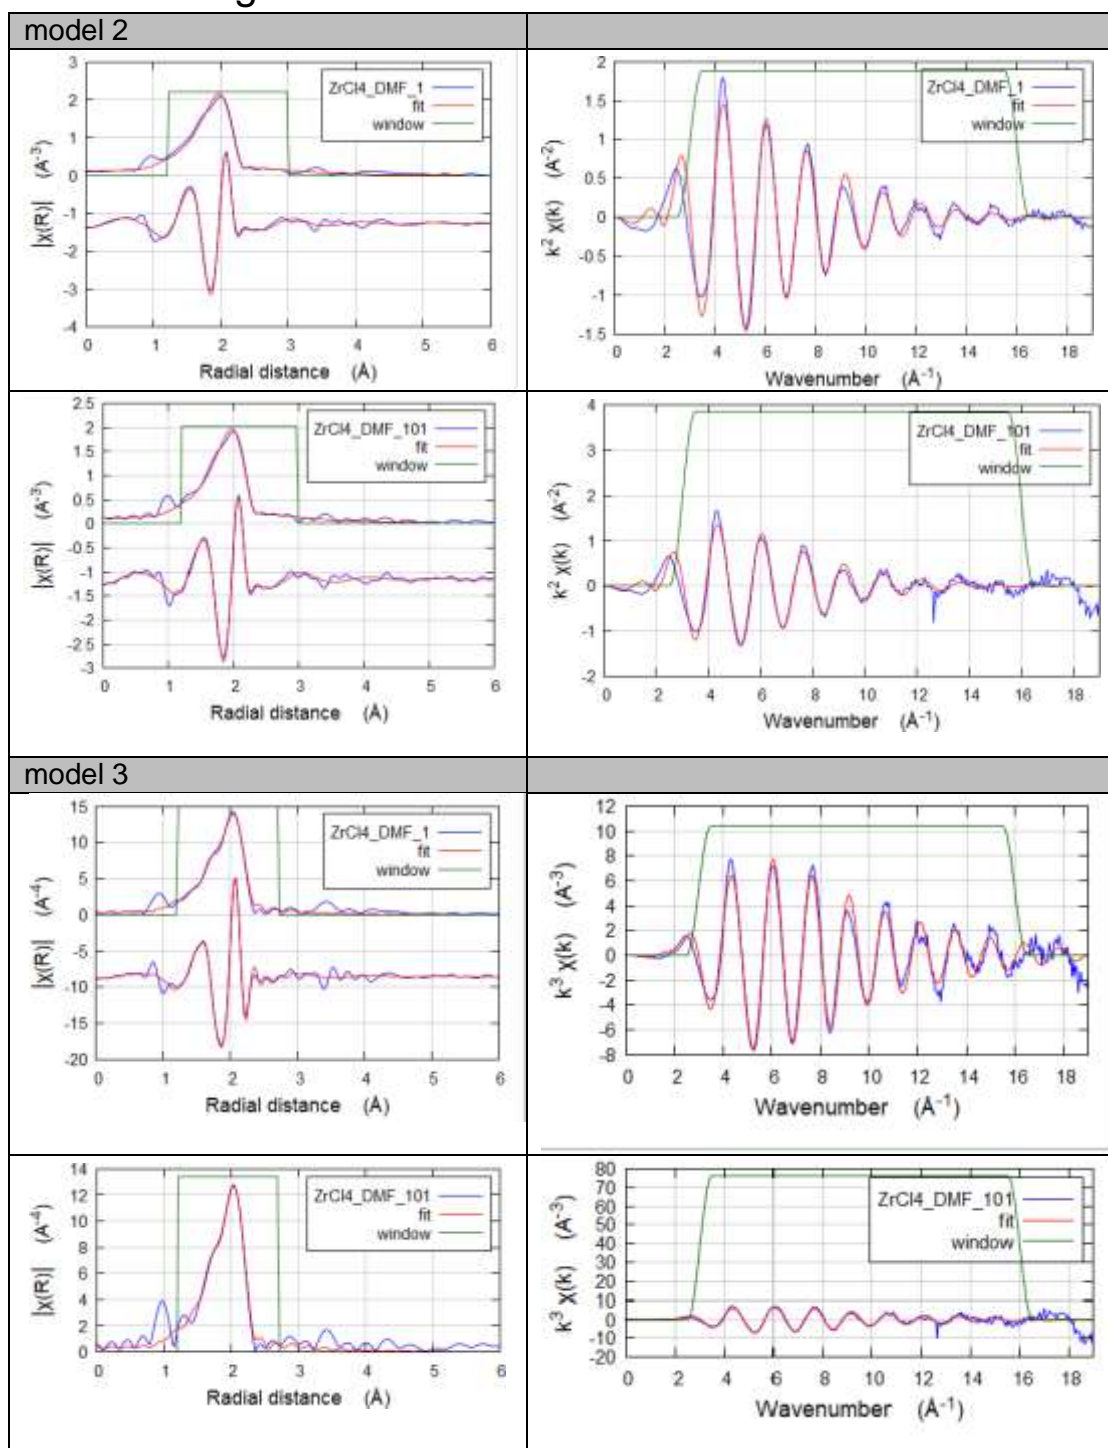

**Fig. S1b** Zr k-edge EXAFS  $R$ -space fit results for ZrCl<sub>4</sub>-DMF solution, first and last spectra in the series. FT of magnitude of EXAFS data (blue line), and corresponding fit (red line) are shown, as well as the real part of the FT data and the corresponding fits. Fitting region is indicated by green box. See Table 2 for fit parameters and results. EXAFS function in  $k \leq 18 \text{\AA}^{-1}$  range is also shown.

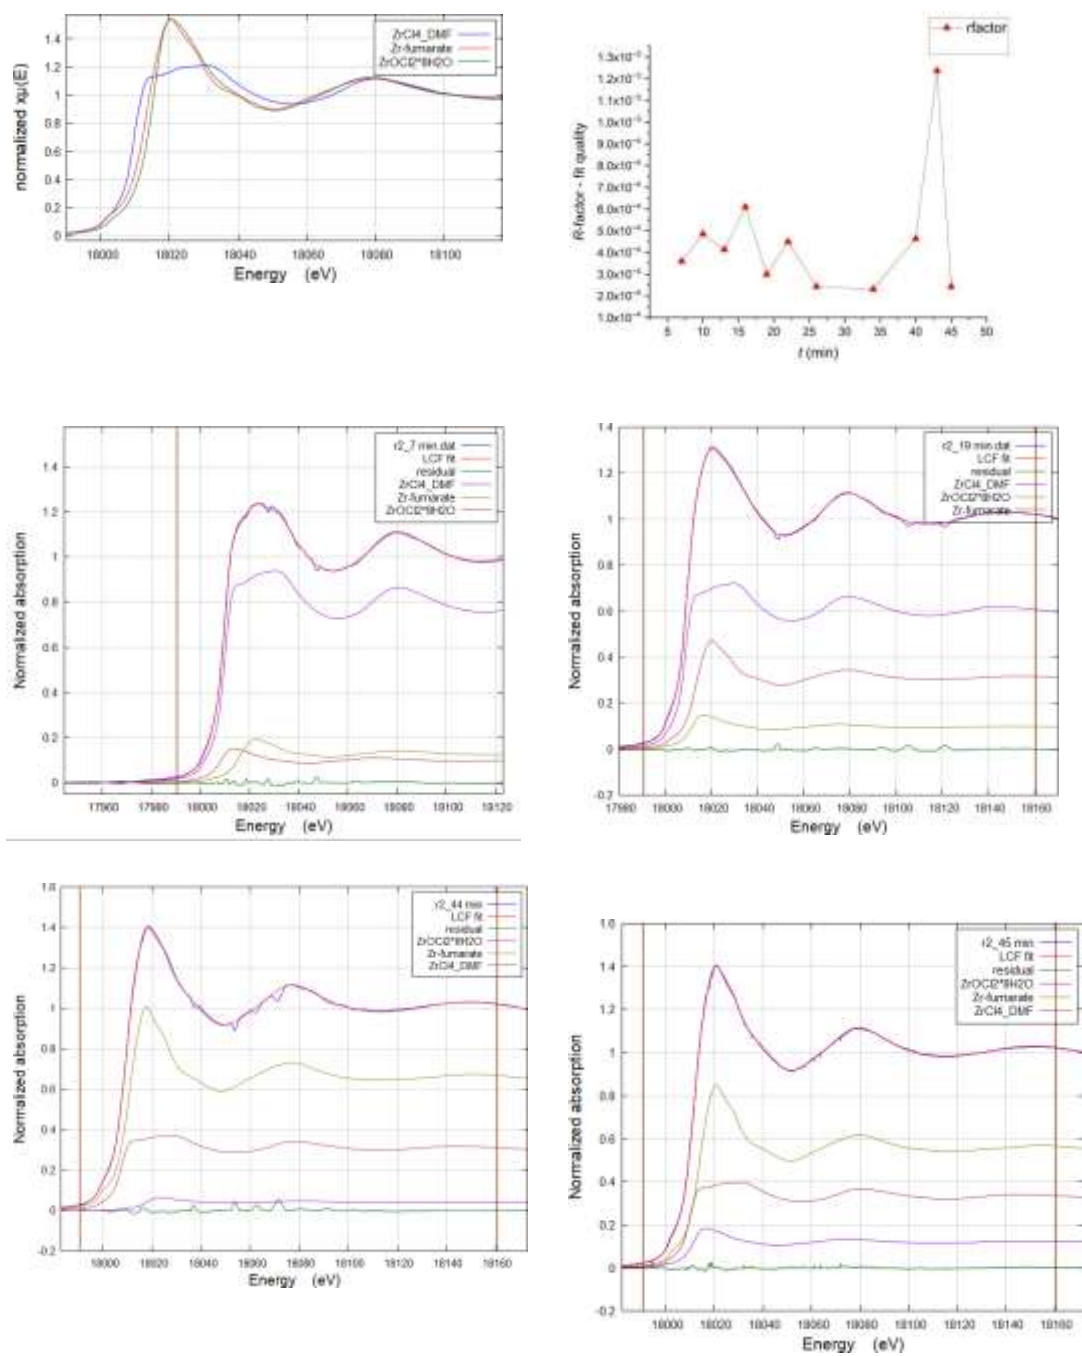

**Fig. S1c** The three references used for LCF,  $R$ -factor of the fits, and the representative examples of the fits for the  $ZrCl_4$ - $H_2O$ -MOD-DMF solution ( $r2$ ), for the data presented in the Figure 2c. The references and the standards were aligned to Zr reference foil standard before the fitting.

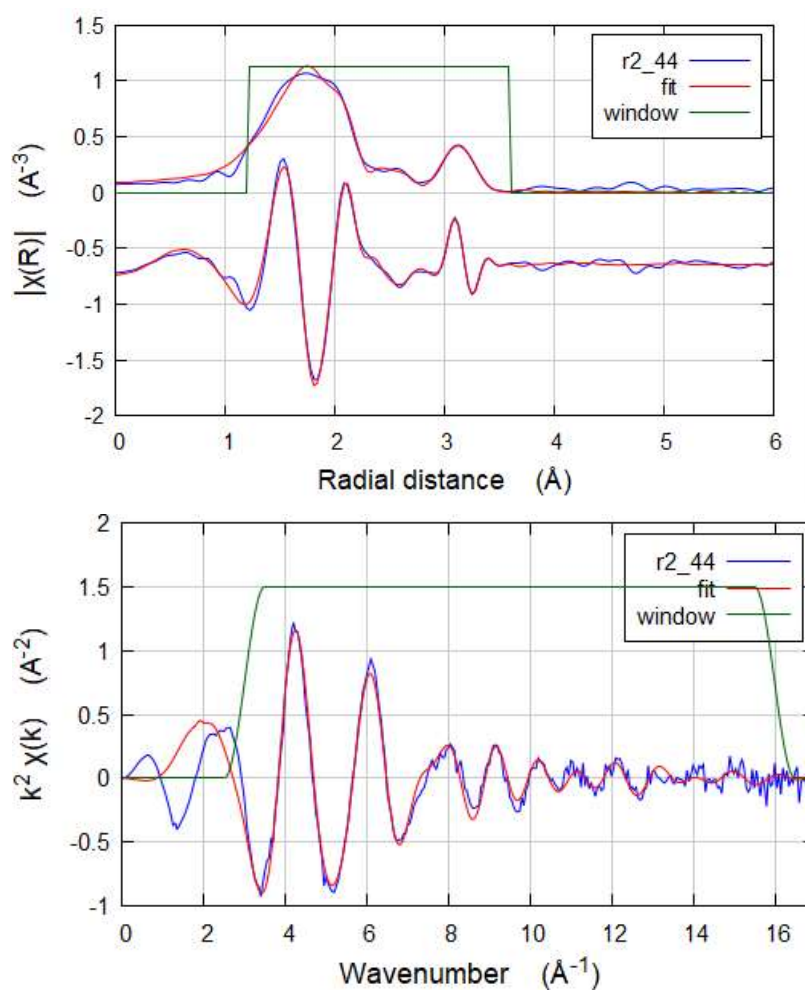

**Fig. S1d** Zr k-edge EXAFS *R*-space fit results for the final spectrum of  $\text{ZrCl}_4\text{-DMF-H}_2\text{O-MOD}$  solution (merged spectra at 43-45 min, r2\_44 in the Table 2). FT of magnitude of the EXAFS data (blue line), and corresponding fit (red line) are shown, as well as the real part of the FT data and the corresponding fits. Fitting region is indicated by green box. The contributions from the single scattering paths used in the fit are also shown. See Table 2 for fit parameters and results. EXAFS function in  $k \leq 18 \text{ \AA}^{-1}$  range is also shown.



## 4. MOF synthesis reactions

### 4.1 LCF of r3-r6 reactions

r3

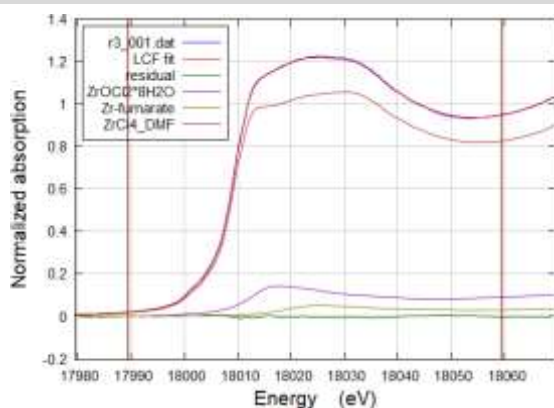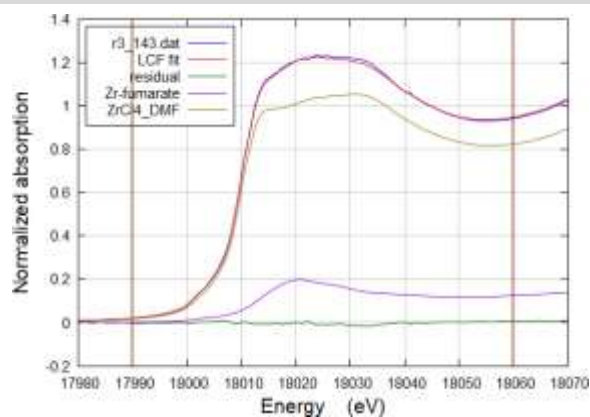

r4

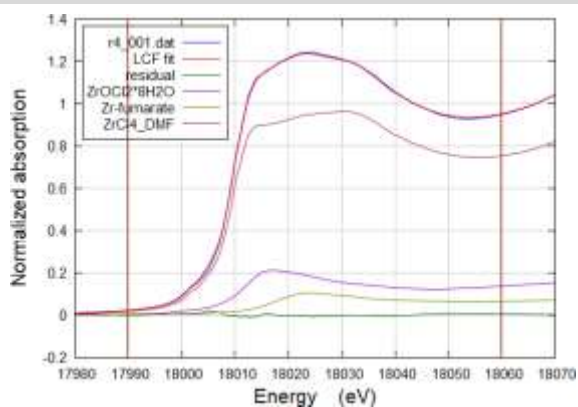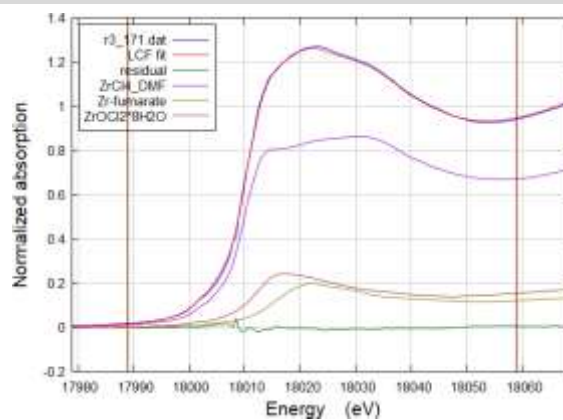

r5

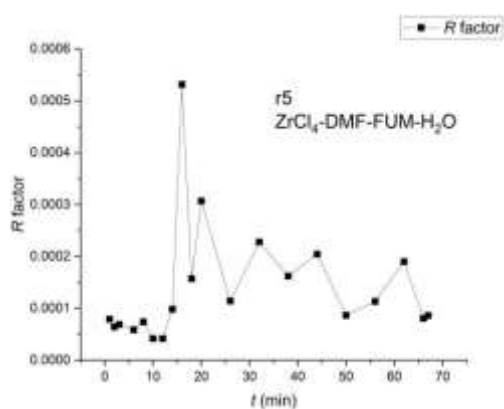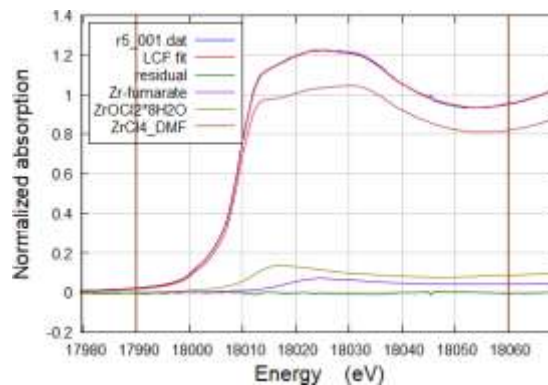



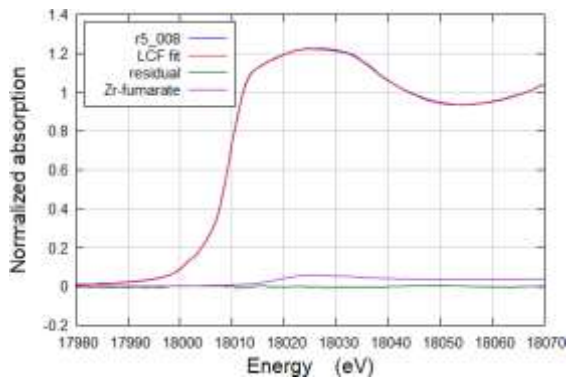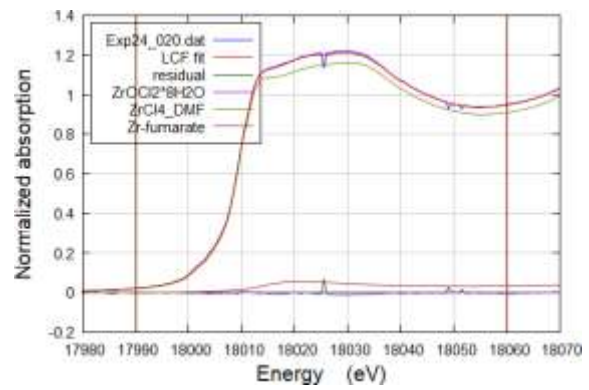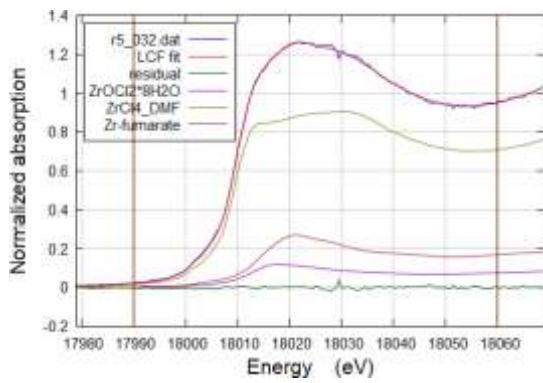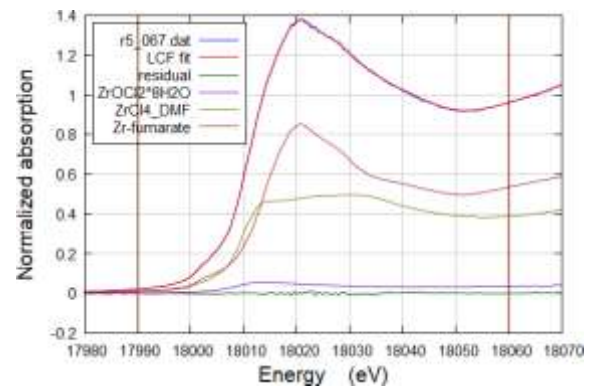

r6

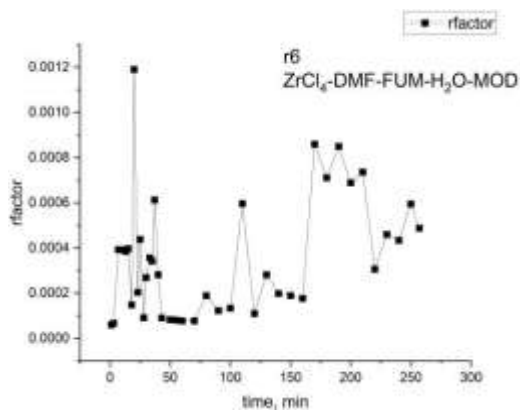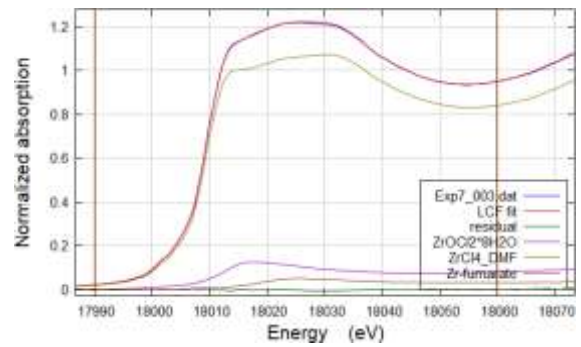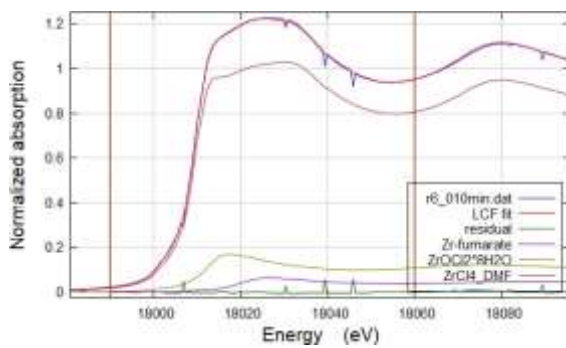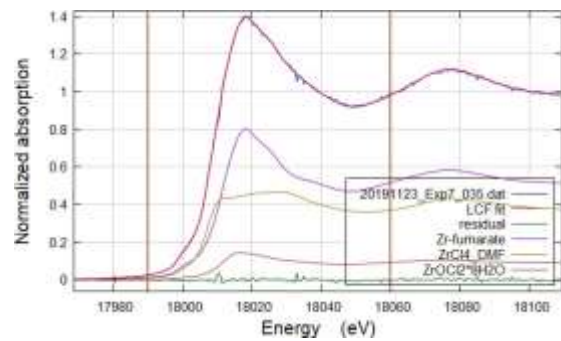

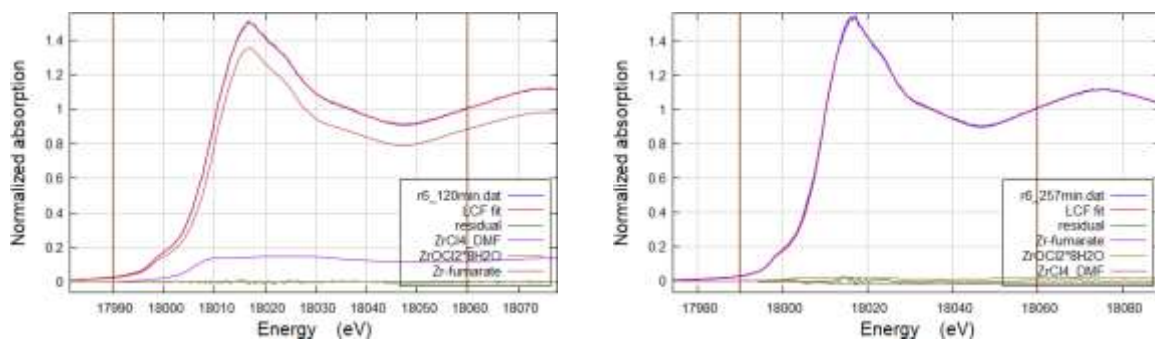

**Fig. S2.** Representative fits and *R*-factors of LCFs for r3-r6. The fits were performed with three references: ZrCl<sub>4</sub>-DMF, Zr-fumarate (Zr-oxocluster), and ZrOCl<sub>2</sub>·8H<sub>2</sub>O (Zr-tetramer).



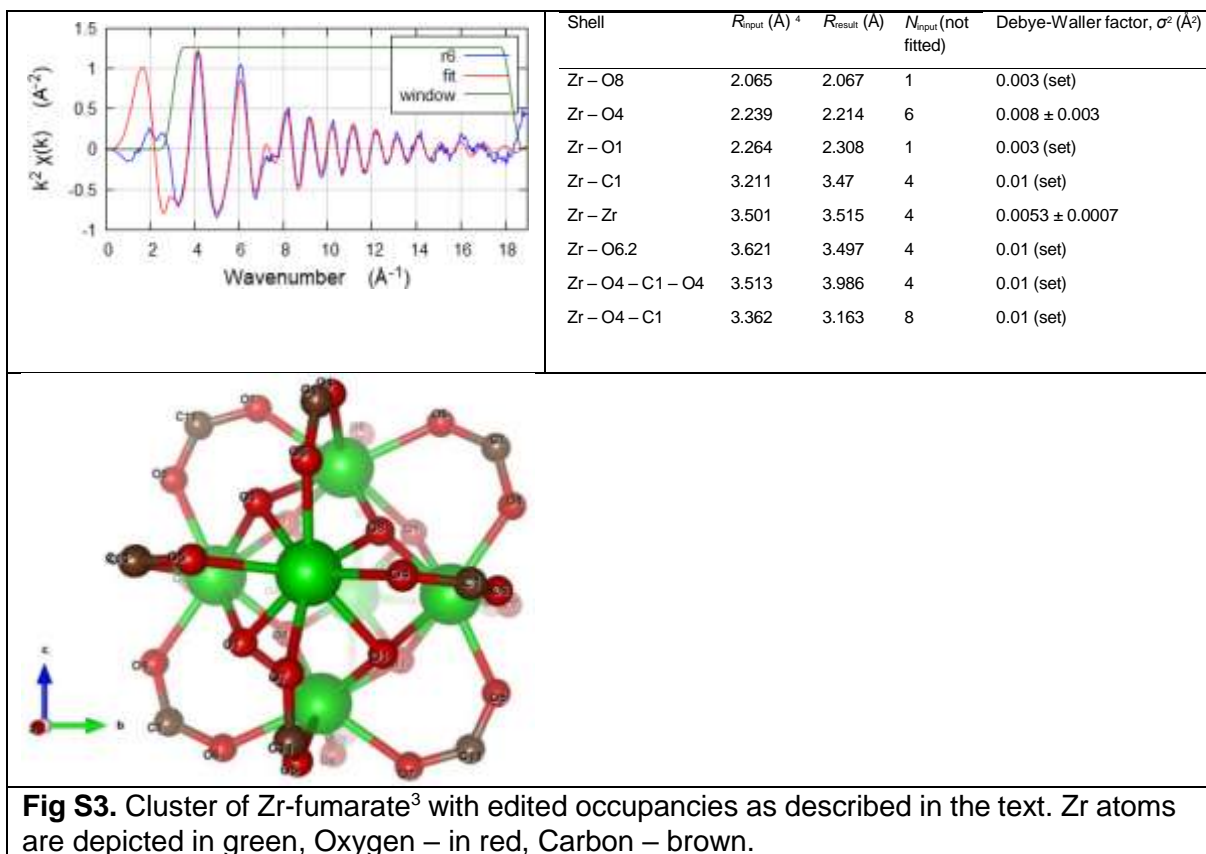

distinct single scattering paths with the average  $R_{\text{eff}}$  of 2.065 Å and 2.239 Å in each of the pairs. All these are bridging  $\mu_3$ -O bonds. The remaining oxygen atoms are bonded to the carbon atoms of the linker with the bond distances between 2.228 – 2.242 Å, i.e. the relative paths are accounted for by the average  $R_{\text{eff}}$  of 2.239 Å. At least one path is accounted for by yet another  $R_{\text{eff}}$  of 2.264 Å (Zr-O1, also a  $\mu_3$ -O bond). In this way, removing the atoms with partial occupancies will introduce significant alteration in the number of atoms in the coordination shells of the eight oxygens that is expected to result in a worse fit with larger disorder factors.

The  $k^{0.5}$ ,  $k^1$ ,  $k^2$ , and  $k^3$ -weighted data were fit simultaneously in 1.2 – 3.59 Å range (two coordination shells,  $k = 3.00 - 18.3 \text{ Å}$ ) in  $R$ -space. All the single scattering paths and those double-scattering paths with contribution rank above 10 % were included in the fits. Firstly, edge energy shift,  $\Delta \square_0$ , total amplitude,  $\square_0^2$ , position of the atoms, and Debye-Waller factors,  $\sigma^2$ , were relaxed. Fit parameters and results are summarized in the Table S2 (Model 1). The fit to the model 1 is visually good and has a low  $R$ -value, however, the Debye-Waller parameters for the single and multiple scattering paths associated with O1 and O8 are negative and nearly negative, respectively, and Zr – O1 distance is unphysical indicating the problem with this model. Fixing the amplitude to the value of 0.81, obtained from the fit to Zr foil standard resulted in physical distances but almost all  $\sigma^2$  were either negative or ill-defined. Among the various modifications of this model, the best results were obtained yet relaxing the amplitude but setting the troubling  $\sigma^2$  factors to some reasonable values. The results are summarized in the table S2 under the *Model 2*. The most reasonable  $\sigma^2$  values were obtained for the six oxygen atoms at  $R_{\text{eff}}$  of 2.239 Å and the Zr atoms responsible for the most intensity of the peak at 3.1 Å ( $R_{\text{eff}} = 3.501 \text{ Å}$ ). This result was characteristic for the vast majority of the fitting attempts (ca. 250) as well as the two reported here in the Table S2.

### 4.3 Kinetics series

r7

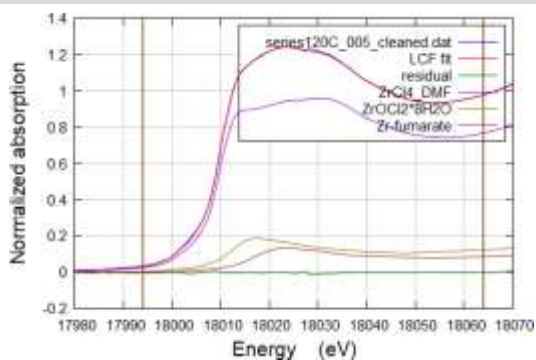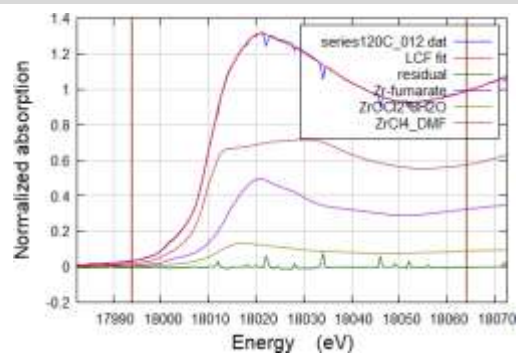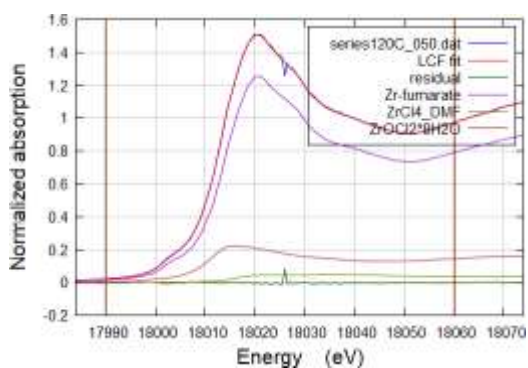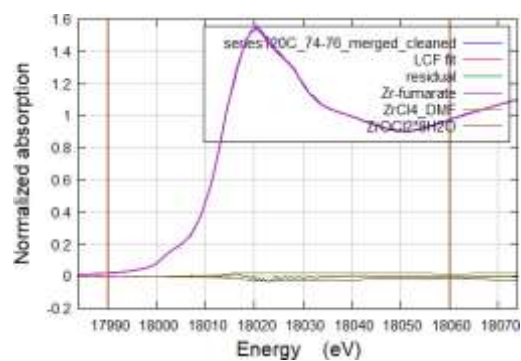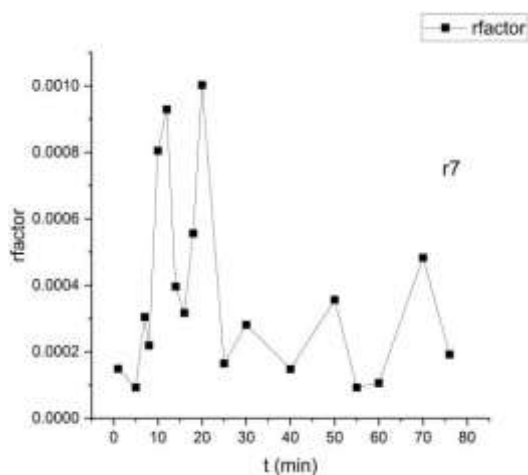

r8

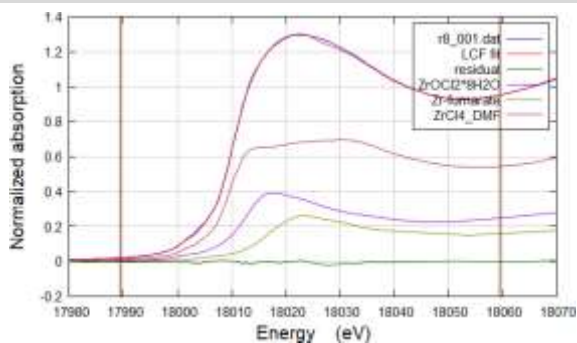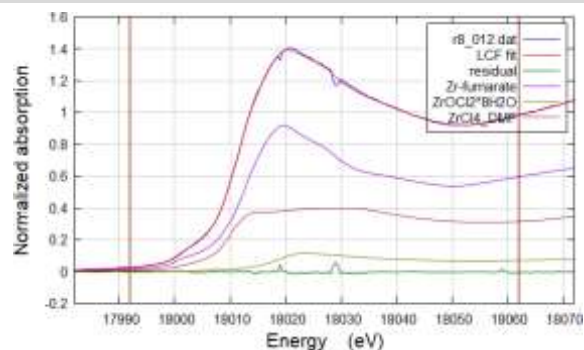



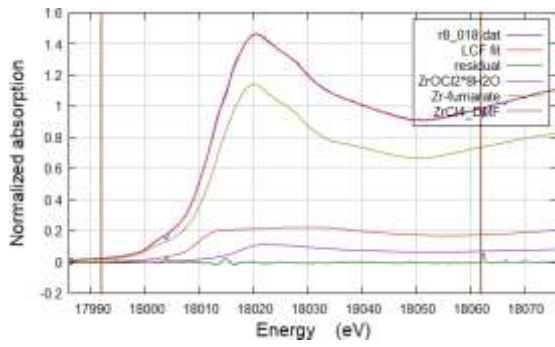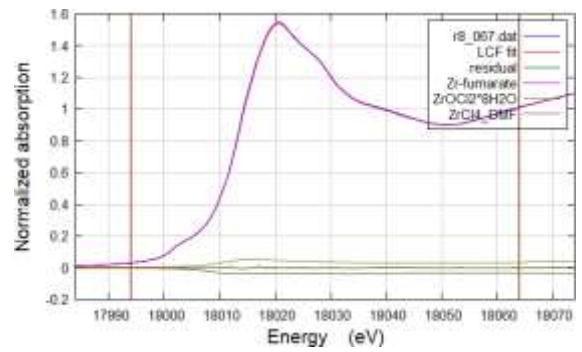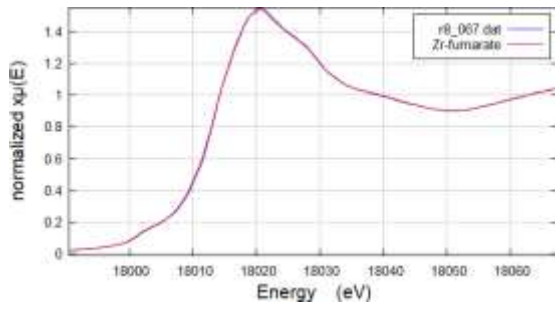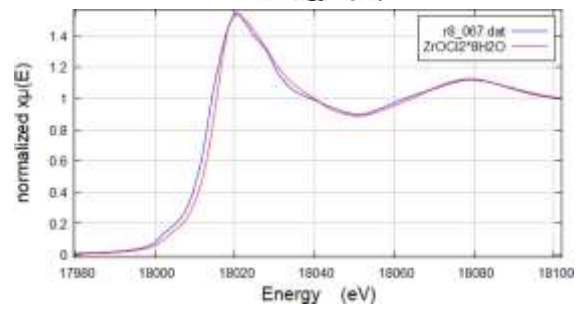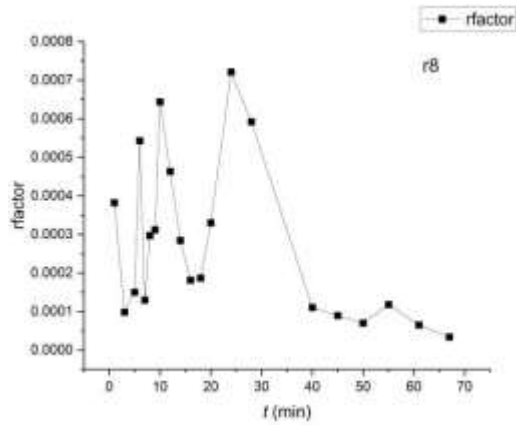

r9

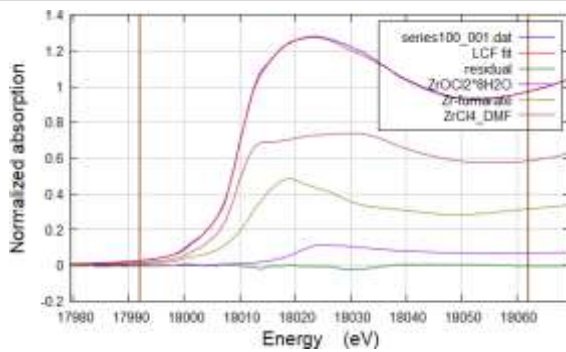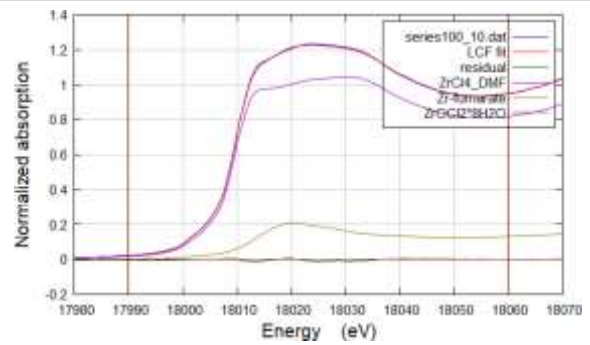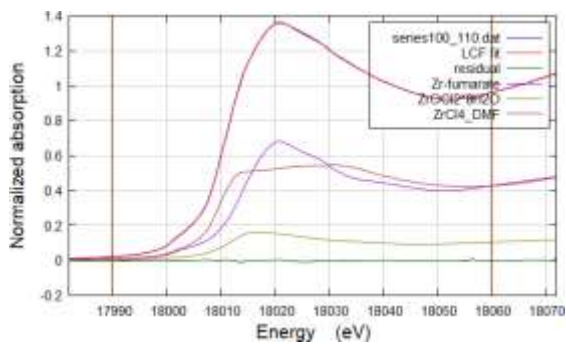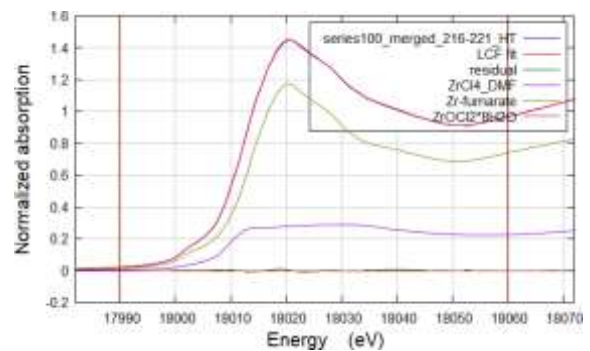

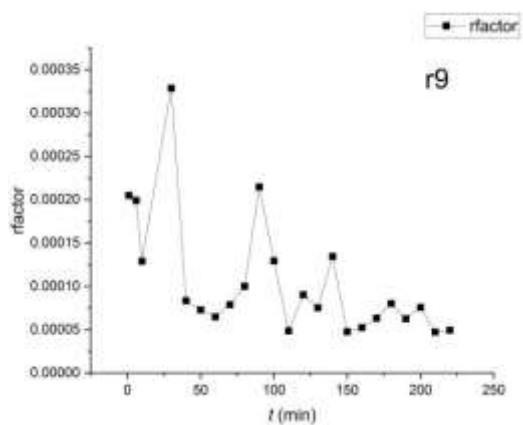

**Fig. S4.** Representative fits and *R*-factors of the LCFs. The fits were performed with three references:  $\text{ZrCl}_4\text{-DMF}$ ,  $\text{Zr-fumarate}$  (Zr-oxocluster), and  $\text{ZrOCl}_2\cdot 8\text{H}_2\text{O}$  (Zr-tetramer). r8: comparison of the last reaction spectra to the two references clearly shows the difference in the fitting to the tetramer and the Zr-oxocluster.



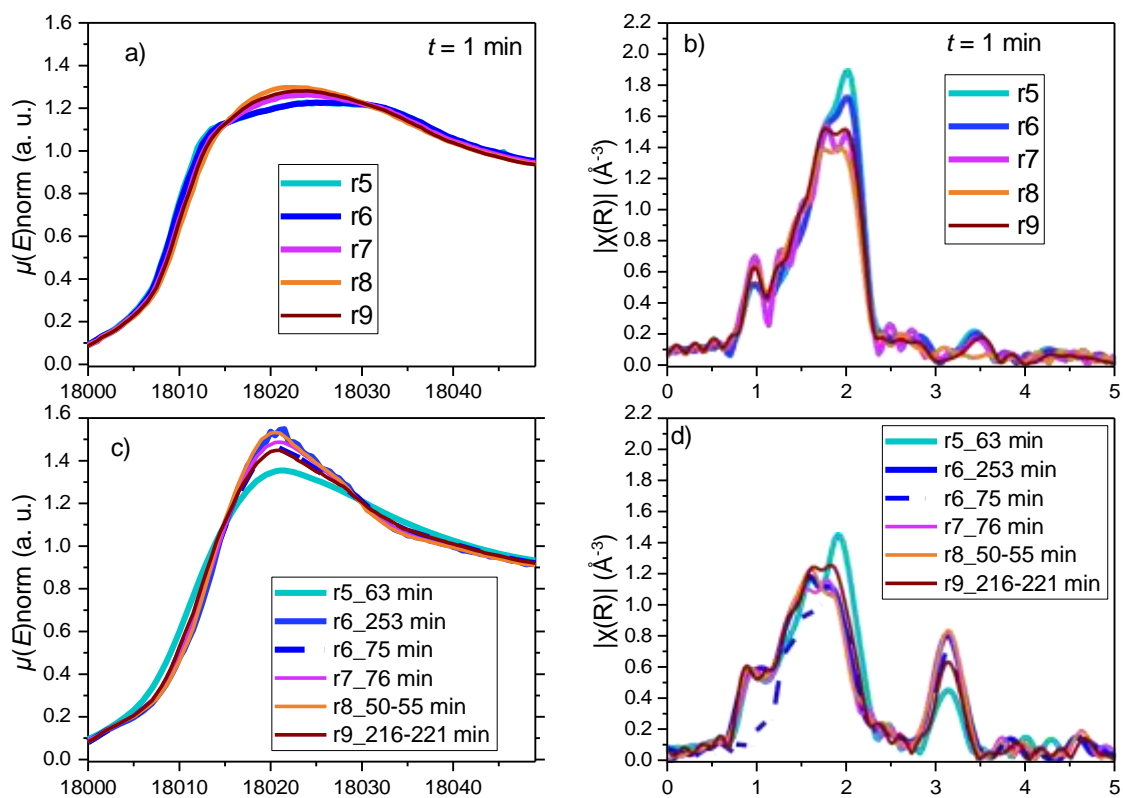

**Fig. S5** XAS spectra for the kinetics series, reactions **r5-r9** with: a,b) the first registered spectra in XANES and EXAFS regions, respectively; c,d) the last registered spectra in XANES and EXAFS regions, and the curves for **r6** obtained after ca. 75 min.

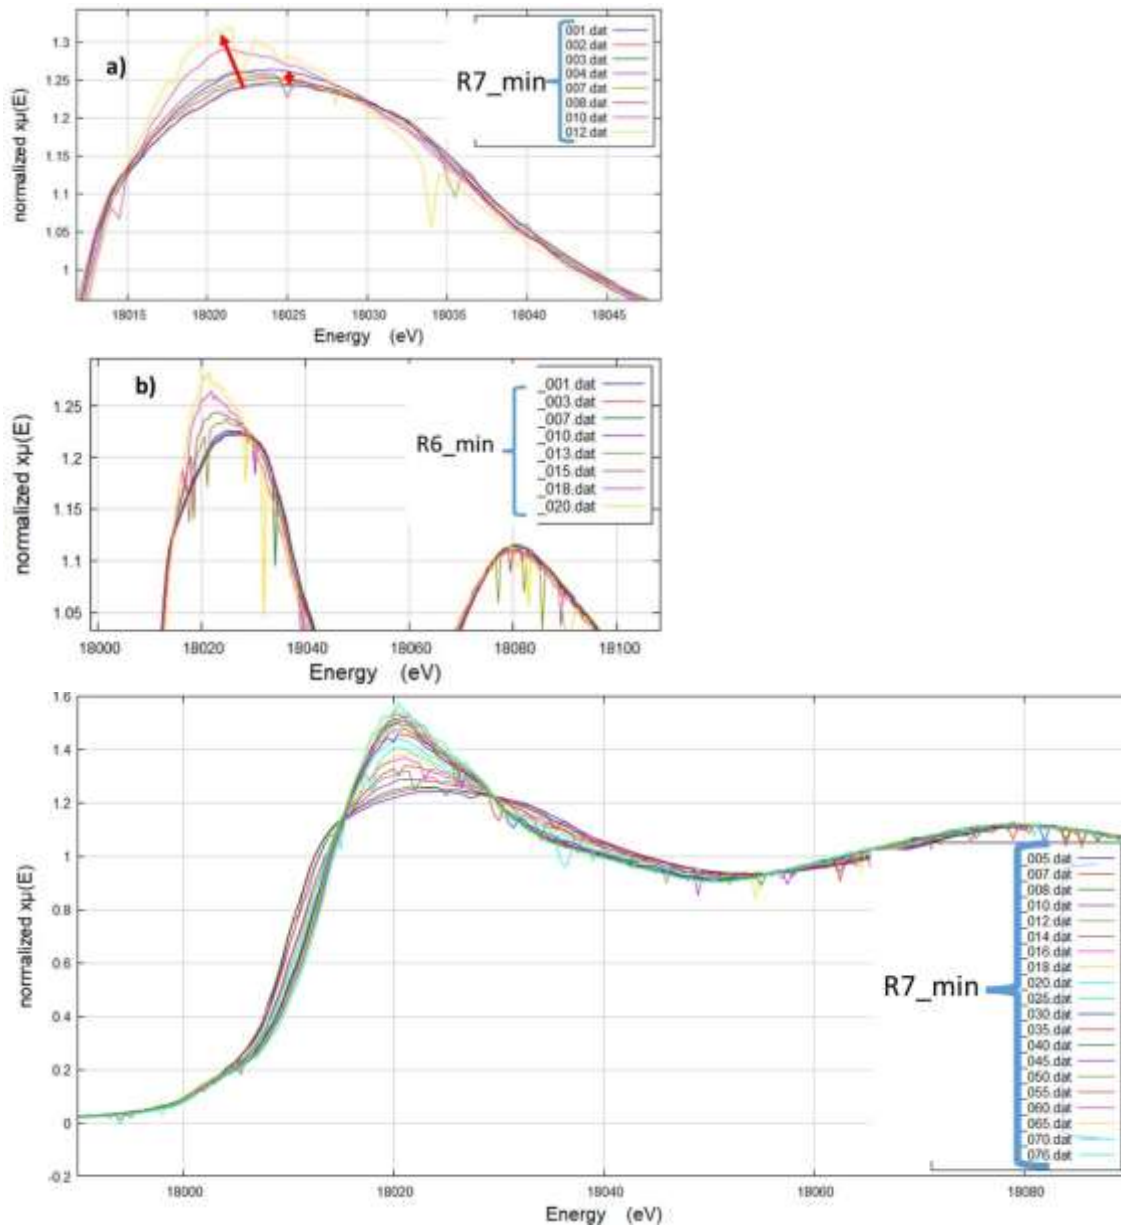

c)  
**Fig. S6** Selected in-situ XANES spectra for r7 and r6. The spectra were collected each minute and the numer corresponds to the minutes from data recording start. The spectra show at least two steps in r7 and moslty 1 step in r6. The lowest panel shows the spectral evolution of the r7.

## 5. LCF and reaction kinetics

The kinetic curves were obtained by fitting the three reference spectra:  $\text{ZrCl}_4\text{-DMF}$  solution,  $\text{Zr-fumarate}$  and  $\text{ZrOCl}_2\cdot 8\text{H}_2\text{O}$  pellets. All weights were between 0 and 1 and their sum was constraint to one. Fits were carried out with free  $E_0$ .

### 5.1 Water series

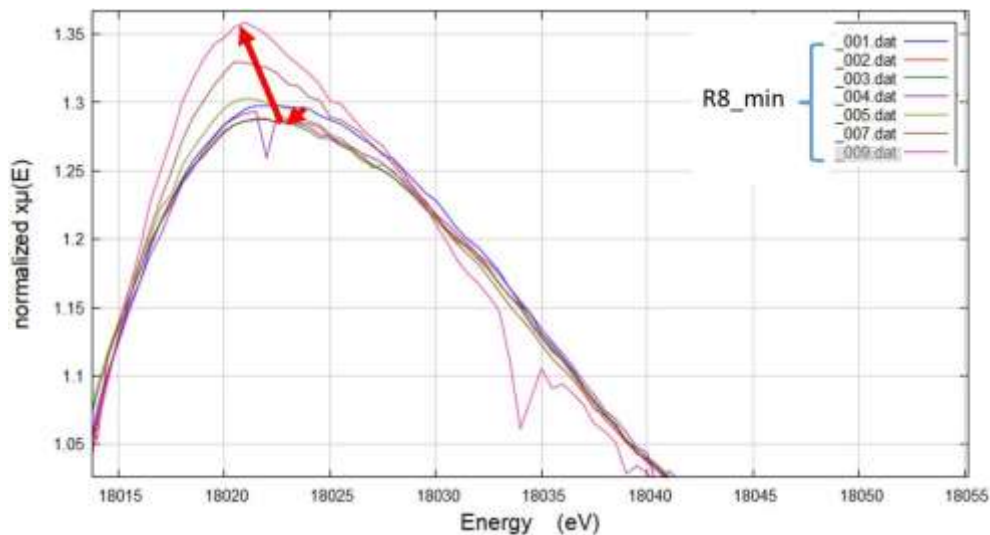

**Fig. S7** Selected in-situ XANES spectra for **r8**. The spectra were collected each minute and the scan number corresponds to the minutes from the start of data recording. The spectra clearly shows at least two steps in the reaction (1-3 min, and 4 min - onwards).

### 5.2 Temperature series

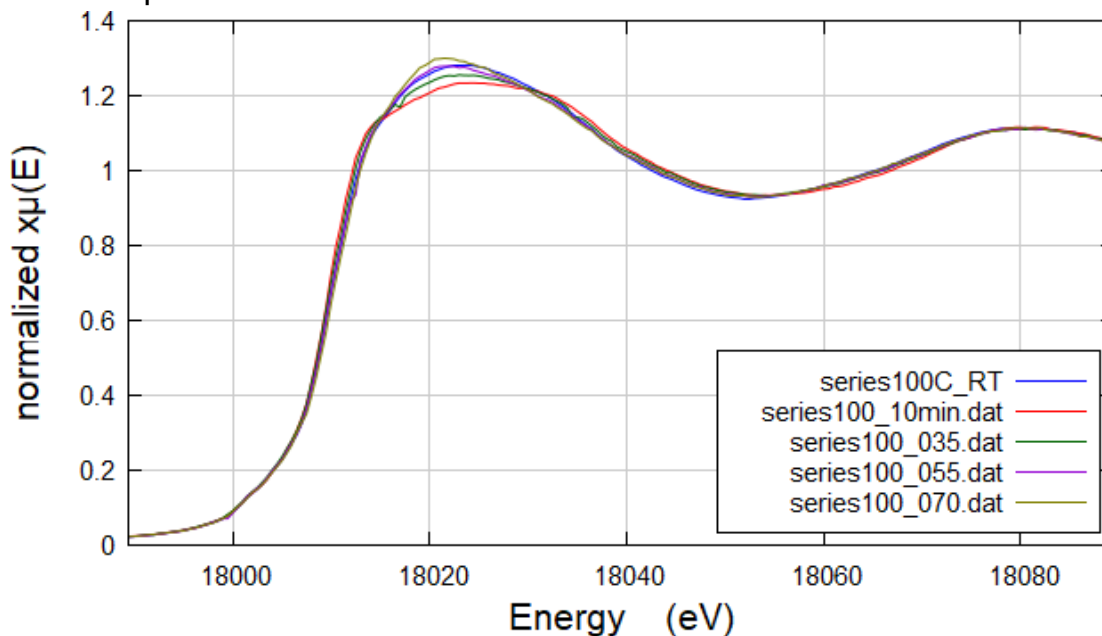

a)

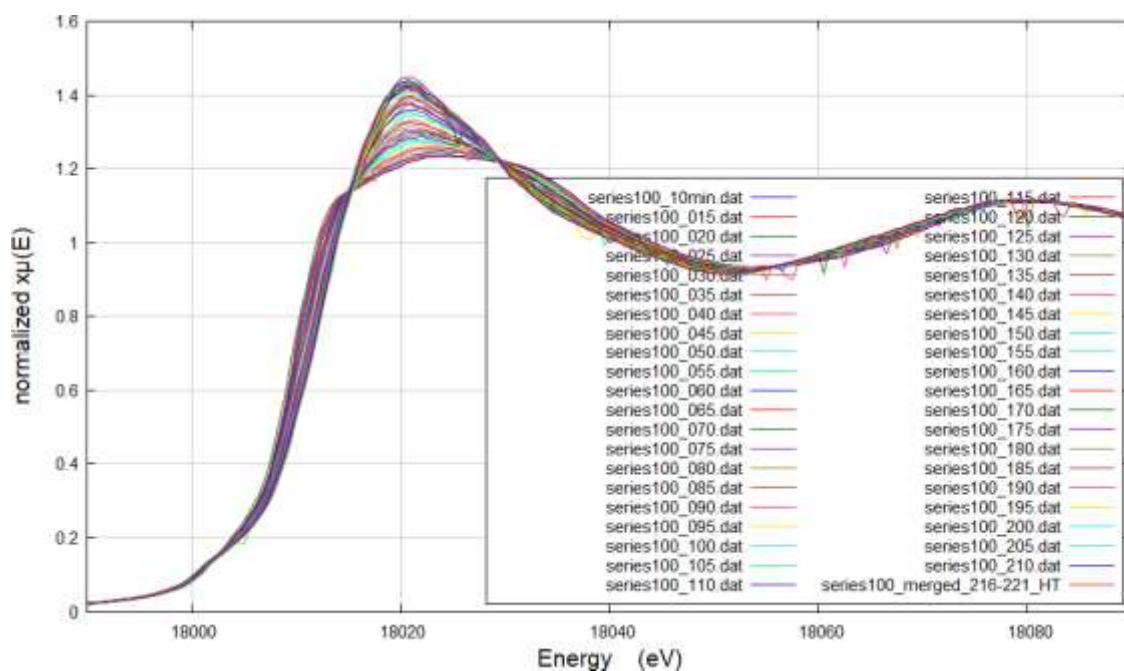

b)

**Fig. S8** a) selected curves of the MOF-synthesis reaction **r9** that demonstrates the changes in the spectra of the solution at *RT*, 10 min into the fast ramp heating and the spectra obtained at 100 °C after 35-70 min; b) XANES region of the spectral series used to produce the kinetic curve with the first and last files as the two standards for linear combination fitting.

## 6. Characterization of MOFs formed in the in-situ reactions

### 6.1 Modulator series

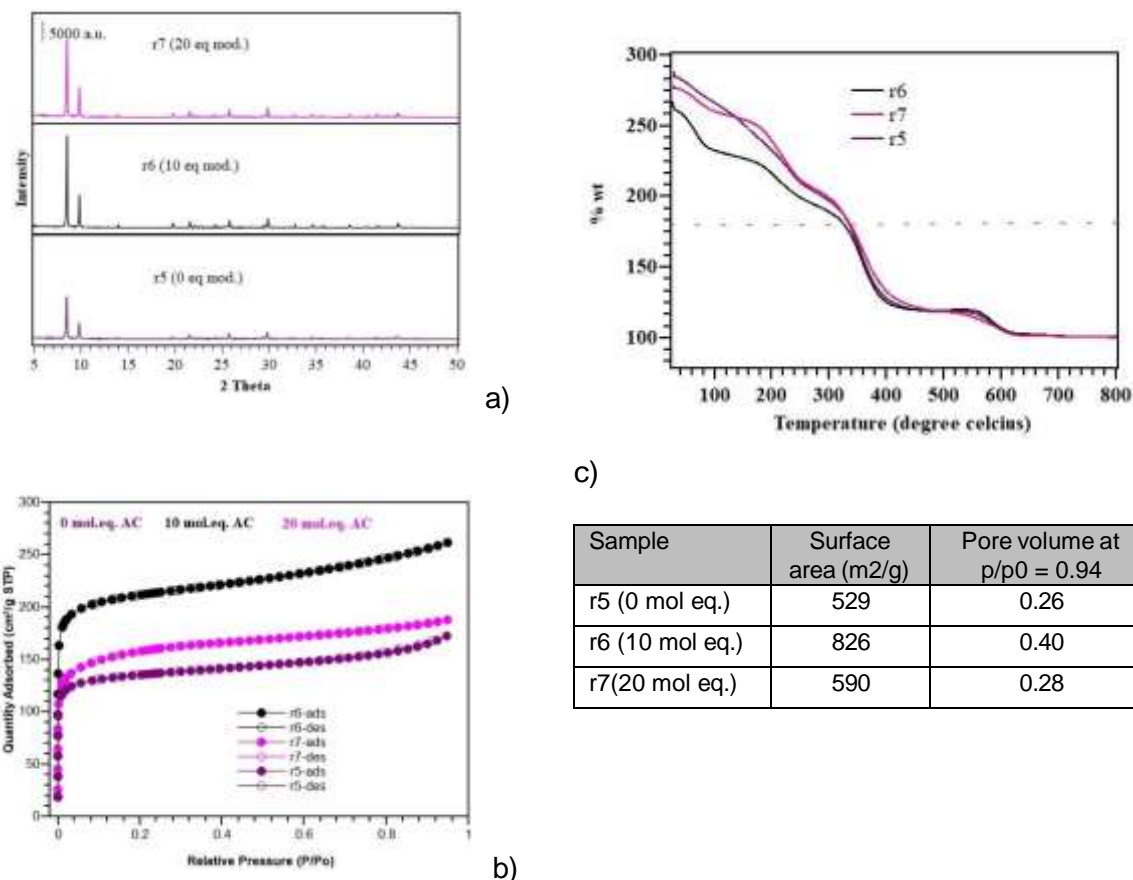

**Fig. S9** PXR D (a), BET (b), and TGA (c) characterization of the r5 – r7 reaction products.

The precipitates of the reactions were separated by centrifugation, washed, dried, and characterized with powder XRD, TGA, N<sub>2</sub> sorption at 77K, and Raman spectroscopy where possible. The XRD, TGA, and BET data on the modulator series are presented in Figure S6. All three samples are well crystalline with the diffraction pattern corresponding to that of Zr-fumarate. The sample synthesized without the modulator has a lower surface area, and slightly higher linker-to-metal ratio in the product than the one expected for the ideal Zr-Fumarate (TGA step for linker decomposition at 179.6 wt%).

The increase in intensity and appearance of well-defined sharp peaks in PXR D indicates the formation of larger crystallites. Such an effect has been previously observed with the addition of a modulator in the Zr-Fumarate synthesis.<sup>4</sup> In all the previous studies, the PXR D reported for synthesis without a modulator showed no reflection. However, we see the well-defined and expected reflection in the PXR D confirming the formation of Zr-Fumarate. The important difference between previously reported synthesis and our synthesis is the amount of DMF, our being highly concentrated.

The thermogravimetric analysis shows almost no difference in between the samples except the mass loss due to the removal of physisorbed solvent. The dashed horizontal line indicates the expected weight loss for the ideal Zr-fumarate. The **r6** sample prepared with 10 eq. of the modulator shows a mass loss for linker decomposition closer to the theoretical mass loss for ideal MOF. The **r5** and **r7** showed mass loss larger than theoretically expected indicating the presence of unreacted organic linker residue.

All three samples were evaluated for porosity. The calculated BET surface area from the N<sub>2</sub> sorption at 77K are shown in the table. MOF made with 10 eq. of the modulator showed the highest surface area (826 m<sup>2</sup>/g). The Wißmann et al.<sup>4</sup> has reported a surface area 856 m<sup>2</sup>/g for Zr-fumarate made with 30 eq. of the modulator.

## 6.2 Temperature series

The PXRD patterns of the samples synthesized at 100, 120, and 130 °C with 20 eqv. modulator are shown in figure 8a. All the patterns show the diffraction peaks expected for Zr-fumarate indicating the successful formation of Zr-Fumarate MOF. A minor difference in the intensity of the diffraction peaks (at low angle) was noticed going from low temperature to high temperature. Intensity increases at higher temperatures. However, this increase is not as significant as one noticed with an increase in modulator amount. The TGA analysis also shows an almost similar weight loss profile for three samples. However, the N<sub>2</sub> sorption at 77K shows the difference in the N<sub>2</sub> uptake, and hence the surface area and pore volume. The sample prepared at a low temperature (100) showed a lower surface area while the sample prepared at 130 C showed high surface area.

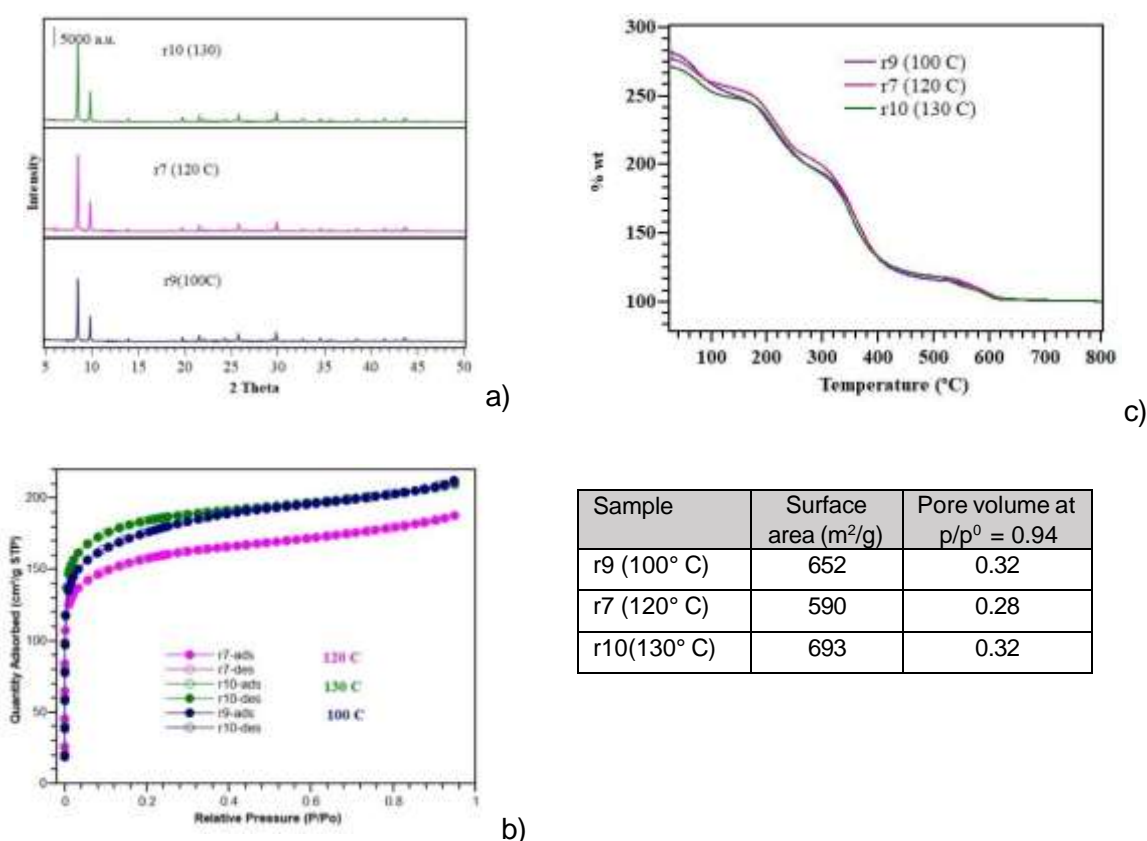

**Fig. S10** PXRD (a), BET (b), and TGA (c) characterization of the **r7**, **r9**, **r10** reaction products.

## 6.3 Water series

In the absence of water, we did not see any precipitate formation in the reaction tube. The reaction solution was as clear as the initial reaction mixture. The addition of 3 molar eq. water led to the successful formation of MOF. Excess amounts of water (8 molar eq.) in the synthesis also gave the Zr-Fumarate MOF product. The laboratory PXRD did not show much difference between the products. However, differences were observed in the TGA and porosity analysis. MOF sample prepared with excess water (**r8**) showed continued mass loss with heating from

RT up to 300C while the Zr-fumarate prepared with 3 eq. showed a two-step mass loss. The sample prepared with an excess of water showed lower N<sub>2</sub> uptake almost half compared to MOF prepared with only 3 eq. of water.

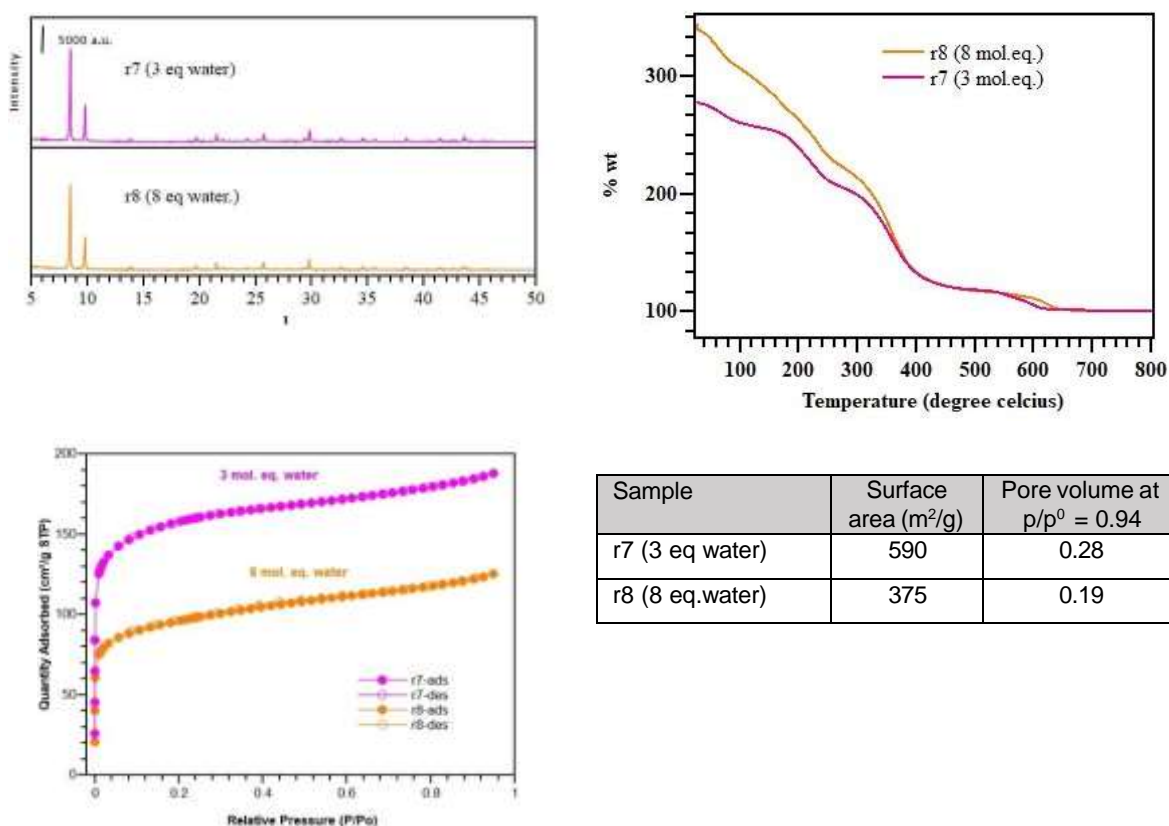

**Fig. S11.** Comparison of the PXRD (a), BET (b), and TGA (c) characterization of the **r7**, and **r8** reaction products.

## 6.4 Analysis of the Raman spectra

Raman spectra of the dried reaction products are shown on the figure 8, and the peak assignment is collected in the Table 4. The assignment is based on literature data and the assumptions that symmetric modes are most intense in the Raman spectra.<sup>5-9</sup> Fumaric acid has a set of fundamental Raman-active skeletal vibrations at 3069 (w,  $\nu_s(\text{CH})$ ) – 1685 ( $\nu_s$ ,  $\nu_s(\text{C}=\text{O})$ ) – 1605 (w,  $\nu(\text{C}=\text{C})$ ) – 1437 (w,  $\delta(\text{COH})$ ) - 1298 (s,  $\delta(\text{CCH})$ ) – 972 (w) and 913 (m,  $\gamma(\text{CCH})$ ) – 693 (m,  $\gamma(\text{CCOO})$ ) – 449 (vw,  $\gamma(\text{COH})$ ), and 199 (m,  $\delta(\text{CCC})$ )  $\text{cm}^{-1}$ .<sup>5</sup>

The Raman features of the linker skeletal modes ( $<1800 \text{ cm}^{-1}$ ) are usually altered when hydrogen in the  $-\text{COOH}$  group is replaced by a cation, allowing in some cases for distinguishing between different coordination of the linker to a cation.<sup>6</sup> In Zr-fumarate, the linker is coordinated via two oxygen atoms of the carboxylate group in *syn, syn* coordination changing the  $\text{C}=\text{O}$  mode to symmetric and asymmetric  $\text{COO}^-$  stretching. The most intense peak at  $1662 \text{ cm}^{-1}$  is assigned to  $\text{C}-\text{O}$  stretching of the coordinated linker. The blue shift with respect to fumaric acid can be explained by larger positive charge on the ion resulting to coordination to the clusters. The peaks at  $1424 - 1437 \text{ cm}^{-1}$  can comprise the combination of  $\nu_s(\text{COO}^-)$  with bending modes of  $-\text{CH}_2$  and  $-\text{COH}$ .



**Table S3.** Raman features in 200 – 1800 cm<sup>-1</sup> region of MOF products obtained in the reactions r5 - r10

| Raman shift, cm <sup>-1</sup> | Compound | Assignment (main contribution)              |
|-------------------------------|----------|---------------------------------------------|
| 3060 m*                       | fumarate | $\nu(\text{C-H})$                           |
| 2940 m                        | fumarate | $\nu(\text{C-H})$                           |
| 1662 vs                       | fumarate | $\nu_{\text{as}}(\text{COO}^-)$             |
| 1590-1542 w, br               | fumarate | $\nu(\text{C=C})$                           |
| 1437-1424 vs                  | fumarate | $\nu_{\text{s}}(\text{COO}^-)$ <sup>7</sup> |
| 1275 s                        | fumarate | $\delta(\text{CCH})$                        |
| <b>1103</b> w                 | fumarate | $\delta(\text{CCH})$                        |
| 995 w                         | fumarate | $\delta(\text{CCO})$                        |
| 902 m                         | fumarate | $\nu_{\text{s}}(\text{C-C})$                |
| 863 m                         | fumarate | $\nu_{\text{as}}(\text{C-C})$               |
| 758 m                         | fumarate | Zr-O-C (linker)                             |
| 664 m                         | fumarate | $\gamma(\text{CCOO})$                       |
| 501 m                         | cluster  | $\nu_{\text{s}}(\text{Zr-}\mu_3\text{-O})$  |
| 408 w                         | cluster  | Zr-O                                        |
| 370 w                         | cluster  | $\nu_{\text{as}}(\text{Zr-}\mu_3\text{-O})$ |
| 304 w                         | fumarate |                                             |
| 249 w                         | fumarate | $\delta(\text{CCC})$                        |

Assignment as discussed in the text.

\*Intensities are indicated as: br – broad, vs – very strong, s – strong, m – medium, w – weak

There are two types of Zr-O bonds in MOF-801: 1) those of the cluster, Zr- $\mu_3$ -O and 2) Zr-O-C of cluster – linker coordination. This first group was observed at 493 and 210 cm<sup>-1</sup>, for  $\nu_{\text{s}}$  and  $\nu_{\text{as}}$ , respectively, in Zr-UiO-66.<sup>10</sup> We suggest that the peak at 501 cm cm<sup>-1</sup> and possibly 408, 370 is(are) responsible for this bond in our data. For the Zr-O-C bond, we tentatively suggest the one at 758 cm could be related to linker-cluster coordination.

In addition to the main modes identified and summarised in the Table 3, a group of modes at 2970-1317-1297-953-889-695 cm<sup>-1</sup> with visible intensity correlation between the samples, marked with asterisks on the spectra, might be noticed. The intensity of this group of peaks increases in the order: r8 < r7/r5 < r9 < r6 < r10, which shows a straightforward negative correlation with the surface area of the samples. Thus, these peaks should be related to impurities in the pores and/or defects degrading the SSA of MOFs. The set of these vibrations is very close to that of the fumaric acid powder, except a strong peak at 1682 cm<sup>-1</sup> that is hindered by the main vibration of the fumarate linker. These peaks can thus be assigned to the unreacted linker in the pores. Presence of DMF and acetic acid in the pores / MOF structure was found by Ragon et al.<sup>11, 12</sup>

**Table S4.** Comparison of the observed extra peaks in the Raman spectra of in-situ generated MOFs and reference compounds

| The unknown compound, work, cm <sup>-1</sup> | Acetic acid, <sup>13</sup> pure | Me(Acac) (Me = Na, K, Ni, Co), solid, aqueous, hydrated <sup>14</sup> | DMF, <sup>1</sup> liquid | Assignment                                             |
|----------------------------------------------|---------------------------------|-----------------------------------------------------------------------|--------------------------|--------------------------------------------------------|
| 3028, m                                      | 3020                            | 3013 - 3030                                                           | 2934, s                  | C-H stretching in -CH <sub>3</sub>                     |
| 2970, s                                      | 2937, s, shoulders at 2985,     | 2925 - 2941                                                           | 2861, s                  |                                                        |
| obscured ~1700 (?)                           | 1664, m                         |                                                                       | 1661, m                  | $\nu(\text{C=O})$ ,<br>$\nu_{\text{as}}(\text{COO}^-)$ |

<sup>1</sup> [https://www.chemicalbook.com/SpectrumEN\\_68-12-2\\_IR1.htm](https://www.chemicalbook.com/SpectrumEN_68-12-2_IR1.htm)

|          |                     |                                         |                        |                                               |
|----------|---------------------|-----------------------------------------|------------------------|-----------------------------------------------|
| ~1460, m | 1428, m             | 1512 – 1575<br>1402 – 1456 (2<br>modes) | 1441<br>1408           | $v_{as}(\text{COO}^-)$<br>$v_s(\text{COO}^-)$ |
| 1317, m  | 1366, w             | 1340 – 1357 (1<br>mode)                 |                        |                                               |
| 1297, s  |                     |                                         |                        | monodentate<br>acetate groups                 |
| 1020, m  | 1014, w             | 1009 – 1070 (2<br>modes)                | 1096, m                |                                               |
| 953, m   |                     | 924 – 962 (1 mode)                      |                        | $v(\text{C-C})$                               |
| 889, s   | 893, intense, sharp |                                         | 867, intense,<br>sharp | $v(\text{C-C})$                               |
| 695, m   | 621, m, sharp       | 615 – 680 (two<br>modes)                | 660, intense,<br>sharp |                                               |
|          | 446, w, sharp       |                                         | 407, m<br>319, mw      |                                               |

---

## References

- (1) Mak, T. C. W. Refinement of the crystal structure of zirconyl chloride octahydrate. *Canadian Journal of Chemistry* **1968**, *46* (22), 3491-3497. DOI: 10.1139/v68-579.
- (2) Ravel, B.; Newville, M. ATHENA, ARTEMIS, HEPHAESTUS: data analysis for X-ray absorption spectroscopy using IFEFFIT. *Journal of Synchrotron Radiation* **2005**, *12* (4), 537-541. DOI: doi:10.1107/S0909049505012719.
- (3) Furukawa, H.; Gándara, F.; Zhang, Y.-B.; Jiang, J.; Queen, W. L.; Hudson, M. R.; Yaghi, O. M. Water Adsorption in Porous Metal–Organic Frameworks and Related Materials. *Journal of the American Chemical Society* **2014**, *136* (11), 4369-4381. DOI: 10.1021/ja500330a.
- (4) Wißmann, G.; Schaate, A.; Lilienthal, S.; Bremer, I.; Schneider, A. M.; Behrens, P. Modulated synthesis of Zr-fumarate MOF. *Microporous and Mesoporous Materials* **2012**, *152*, 64-70. DOI: <https://doi.org/10.1016/j.micromeso.2011.12.010>.
- (5) Bayer, M. C.; Jessen, C.; Kornath, A. J. Preparation and Characterization of Protonated Fumaric Acid. *Zeitschrift für anorganische und allgemeine Chemie* **2020**, *646* (7), 333-339. DOI: <https://doi.org/10.1002/zaac.202000091>.
- (6) Hadjiivanov, K. I.; Panayotov, D. A.; Mihaylov, M. Y.; Ivanova, E. Z.; Chakarova, K. K.; Andonova, S. M.; Drenchev, N. L. Power of Infrared and Raman Spectroscopies to Characterize Metal-Organic Frameworks and Investigate Their Interaction with Guest Molecules. *Chemical Reviews* **2021**, *121* (3), 1286-1424. DOI: 10.1021/acs.chemrev.0c00487.
- (7) De Gelder, J.; De Gussem, K.; Vandenabeele, P.; Moens, L. Reference database of Raman spectra of biological molecules. *Journal of Raman Spectroscopy* **2007**, *38* (9), 1133-1147. DOI: 10.1002/jrs.1734.
- (8) Iancu, S. D.; Stefancu, A.; Moisoiu, V.; Leopold, L. F.; Leopold, N. The role of Ag<sup>+</sup>, Ca<sup>2+</sup>, Pb<sup>2+</sup> and Al<sup>3+</sup> adions in the SERS turn-on effect of anionic analytes. *Beilstein Journal of Nanotechnology* **2019**, *10*, 2338-2345. DOI: 10.3762/bjnano.10.224.
- (9) Ganesh, M.; Hemalatha, P.; Peng, M. M.; Cha, W. S.; Jang, H. T. Zr-Fumarate MOF a Novel CO<sub>2</sub>-Adsorbing Material: Synthesis and Characterization. *AEROSOL AND AIR QUALITY RESEARCH* **2014**, *14* (6), 1605-1612. DOI: 10.4209/aaqr.2013.11.0337.
- (10) Shearer, G. C.; Chavan, S.; Ethiraj, J.; Vitillo, J. G.; Svelle, S.; Olsbye, U.; Lamberti, C.; Bordiga, S.; Lillerud, K. P. Tuned to Perfection: Ironing Out the Defects in Metal-Organic Framework UiO-66. *Chemistry of Materials* **2014**, *26* (14), 4068-4071. DOI: 10.1021/cm501859p.
- (11) Ragon, F.; Chevreau, H.; Devic, T.; Serre, C.; Horcajada, P. Impact of the Nature of the Organic Spacer on the Crystallization Kinetics of UiO-66(Zr)-Type MOFs. *CHEMISTRY-A EUROPEAN JOURNAL* **2015**, *21* (19), 7135-7143. DOI: 10.1002/chem.201406119.
- (12) Ragon, F.; Horcajada, P.; Chevreau, H.; Hwang, Y. K.; Lee, U. H.; Miller, S. R.; Devic, T.; Chang, J.-S.; Serre, C. In Situ Energy-Dispersive X-ray Diffraction for the Synthesis Optimization and Scale-up of the Porous Zirconium Terephthalate UiO-66. *Inorg. Chem.* **2014**, *53* (5), 2491-2500. DOI: 10.1021/ic402514n.
- (13) Wan, F.; Du, L.; Chen, W.; Wang, P.; Wang, J.; Shi, H. A Novel Method to Directly Analyze Dissolved Acetic Acid in Transformer Oil without Extraction Using Raman Spectroscopy. *Energies* **2017**, *10* (7), 967.
- (14) Frost, R. L.; Klopogge, J. T. Raman spectroscopy of the acetates of sodium, potassium and magnesium at liquid nitrogen temperature. *Journal of Molecular Structure* **2000**, *526* (1), 131-141. DOI: [https://doi.org/10.1016/S0022-2860\(00\)00460-9](https://doi.org/10.1016/S0022-2860(00)00460-9).
